# Supplementary material
Source: MDPI journal article supplement (https://www.mdpi.com/2073-4344/13/2/345)
Supplement: s1 [file s1]

## Supplementary Materials

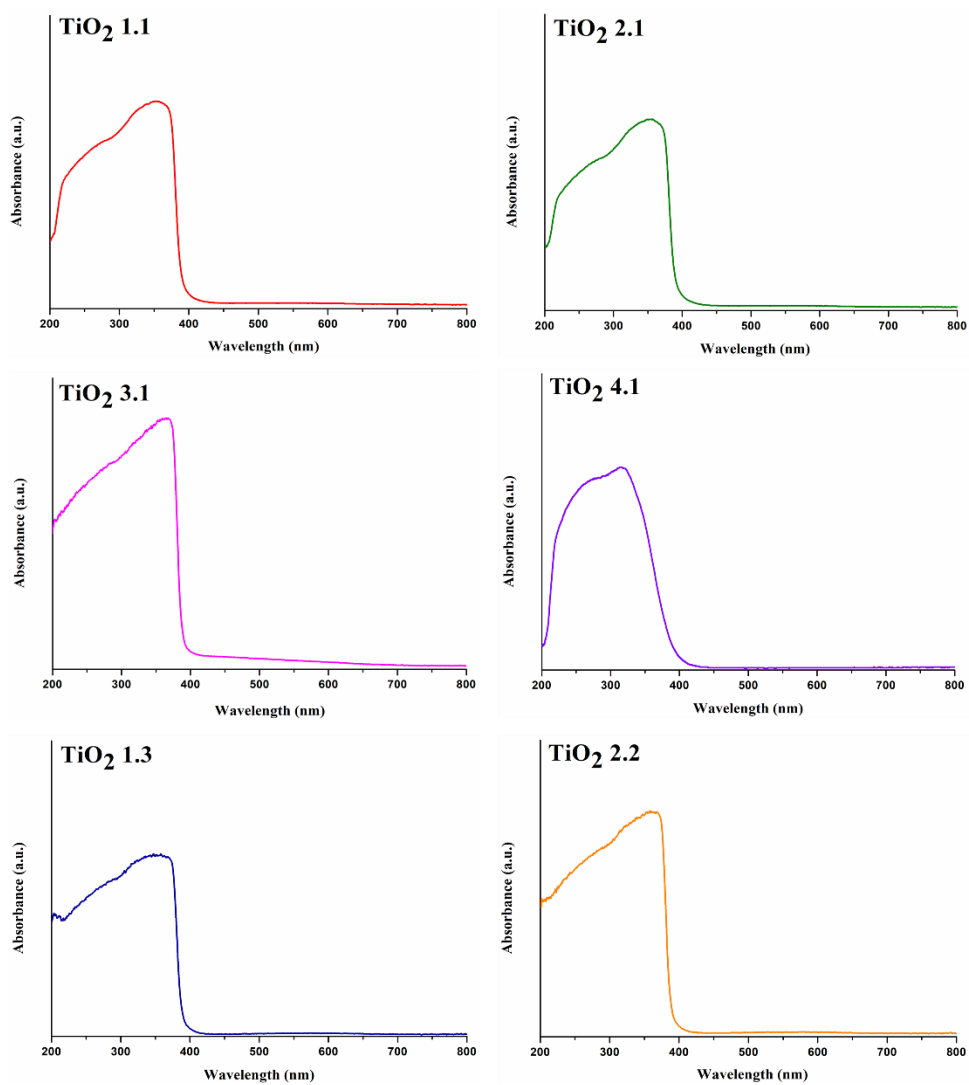

**Figure S1.** UVDR spectra for the synthesized titania samples, considering various ultrasonication regimes.

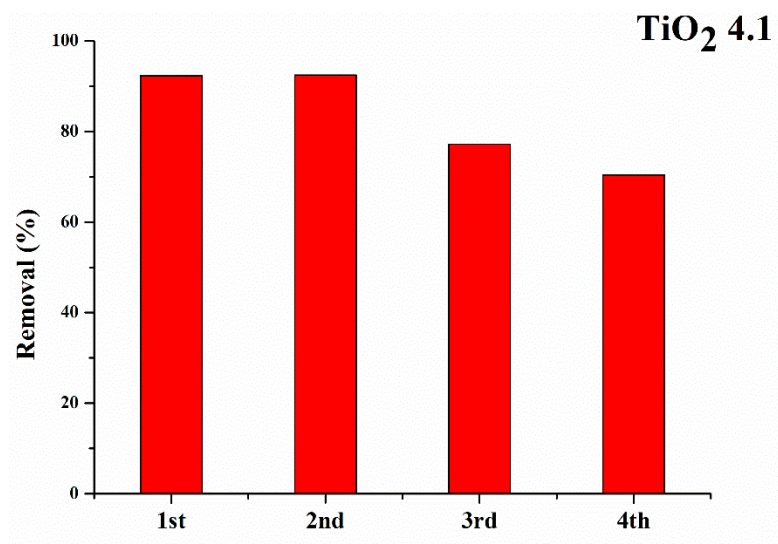

**Figure S2.** The reusability of TiO<sub>2</sub> 4.1 sample for four cycles of application for CR photodegradation.

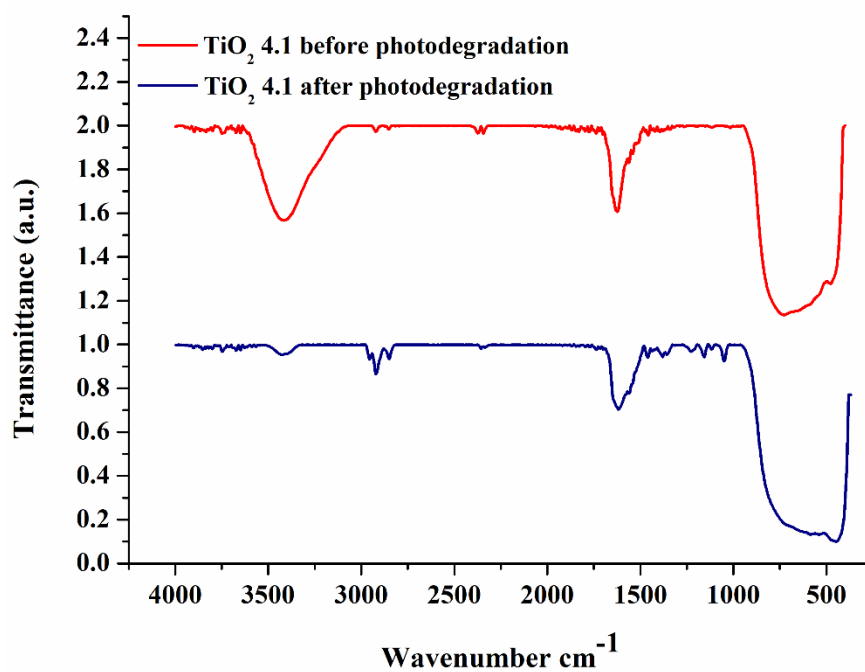

**Figure S3.** FTIR spectra of TiO<sub>2</sub> 4.1 sample before and after photodegradation test of CR dye.
